# Supplementary material
Source: PubMed Central journal article supplement (PMC7111318)
Supplement: mmc3.pdf [file mmc3.pdf]

**Table S3. Cryo-EM data collection, refinement and validation statistics, related to Figure 4.**

|                                                     | Echovirus 6<br>full particle (pH7.4)<br>(EMDB-9690)<br>(PDB 6ILP) | Echovirus 6<br>empty particle (pH7.4)<br>(EMDB-9689)<br>(PDB 6ILO) | Echovirus 6<br>full particle (pH5.5)<br>(EMDB-9688)<br>(PDB 6ILN) |
|-----------------------------------------------------|-------------------------------------------------------------------|--------------------------------------------------------------------|-------------------------------------------------------------------|
| <b>Data collection and processing</b>               |                                                                   |                                                                    |                                                                   |
| Magnification                                       | 37037                                                             | 37037                                                              | 37037                                                             |
| Voltage (kV)                                        | 300                                                               | 300                                                                | 300                                                               |
| Electron exposure (e <sup>-</sup> /Å <sup>2</sup> ) | 40                                                                | 40                                                                 | 40                                                                |
| Defocus range (µm)                                  | -1.0 to -3.0                                                      | -1.0 to -3.0                                                       | -1.0 to -3.0                                                      |
| Pixel size (Å)                                      | 1.35                                                              | 1.35                                                               | 1.35                                                              |
| Symmetry imposed                                    | Icosahedral                                                       | Icosahedral                                                        | Icosahedral                                                       |
| Initial particle images (no.)                       | 156000                                                            | 156000                                                             | 24169                                                             |
| Final particle images (no.)                         | 45346                                                             | 15077                                                              | 4321                                                              |
| Map resolution (Å)                                  | 2.9                                                               | 3.2                                                                | 3.4                                                               |
| FSC threshold                                       | 0.143                                                             | 0.143                                                              | 0.143                                                             |
| Map resolution range (Å)                            | 2.9-5.0                                                           | 3.0-5.0                                                            | 3.0-5.0                                                           |
| <b>Refinement</b>                                   |                                                                   |                                                                    |                                                                   |
| Initial model used (PDB code)                       | 1EV1                                                              | Echovirus 6                                                        | Echovirus 6                                                       |
| Model resolution (Å)                                | 2.9                                                               | 3.2                                                                | 3.4                                                               |
| Model resolution range (Å)                          | 540.0-2.9                                                         | 540.0-3.2                                                          | 540.0-3.4                                                         |
| Map sharpening <i>B</i> factor (Å <sup>2</sup> )    | -127                                                              | -129                                                               | -114                                                              |
| Model map FSC (masked)                              | 0.81                                                              | 0.84                                                               | 0.84                                                              |
| Model composition                                   |                                                                   |                                                                    |                                                                   |
| Non-hydrogen atoms                                  | 6503                                                              | 5469                                                               | 6503                                                              |
| Protein residues                                    | 823                                                               | 693                                                                | 823                                                               |
| Ligands                                             | 1                                                                 | 0                                                                  | 1                                                                 |
| <i>B</i> factors (Å <sup>2</sup> )                  |                                                                   |                                                                    |                                                                   |
| Protein                                             | 30                                                                | 56                                                                 | 50                                                                |
| Ligand                                              | 22                                                                | -                                                                  | 25                                                                |
| R.m.s. deviations                                   |                                                                   |                                                                    |                                                                   |
| Bond lengths (Å)                                    | 0.006                                                             | 0.008                                                              | 0.007                                                             |
| Bond angles (°)                                     | 1.24                                                              | 1.29                                                               | 1.23                                                              |
| Validation                                          |                                                                   |                                                                    |                                                                   |
| MolProbity score                                    | 1.53                                                              | 1.67                                                               | 1.56                                                              |
| Clashscore                                          | 2.9                                                               | 4.0                                                                | 3.0                                                               |
| Poor rotamers (%)                                   | 0.83                                                              | 0                                                                  | 0.83                                                              |
| Ramachandran plot                                   |                                                                   |                                                                    |                                                                   |
| Favored (%)                                         | 93                                                                | 92.2                                                               | 93                                                                |
| Allowed (%)                                         | 6.75                                                              | 7.8                                                                | 6.75                                                              |
| Disallowed (%)                                      | 0.25                                                              | 0                                                                  | 0.25                                                              |

**Table S3. Cryo-EM data collection, refinement and validation statistics, related to Figure 4.**

|                                                     | Echovirus 6 bound to CD55<br>pH 7.4<br>(EMDB-9685)<br>(PDB 6ILK) | Echovirus 6 bound to CD55<br>pH 5.5<br>(EMDB-9684)<br>(PDB 6ILJ) |
|-----------------------------------------------------|------------------------------------------------------------------|------------------------------------------------------------------|
| <b>Data collection and processing</b>               |                                                                  |                                                                  |
| Magnification                                       | 37037                                                            | 37037                                                            |
| Voltage (kV)                                        | 300                                                              | 300                                                              |
| Electron exposure (e <sup>-</sup> /Å <sup>2</sup> ) | 40                                                               | 40                                                               |
| Defocus range (µm)                                  | -1.0 to -3.0                                                     | -1.0 to -3.0                                                     |
| Pixel size (Å)                                      | 1.35                                                             | 1.35                                                             |
| Symmetry imposed                                    | Icosahedral                                                      | Icosahedral                                                      |
| Initial particle images (no.)                       | 137281                                                           | 34927                                                            |
| Final particle images (no.)                         | 28528                                                            | 11494                                                            |
| Map resolution (Å)                                  | 3.0                                                              | 3.6                                                              |
| FSC threshold                                       | 0.143                                                            | 0.143                                                            |
| Map resolution range (Å)                            | 3.0-5.0                                                          | 3.0-5.0                                                          |
| <b>Refinement</b>                                   |                                                                  |                                                                  |
| Initial model used (PDB code)                       | Echovirus 6                                                      | Echovirus 6                                                      |
| Model resolution (Å)                                | 3.0                                                              | 3.6                                                              |
| Model resolution range (Å)                          | 540.0-3.0                                                        | 540.0-3.6                                                        |
| Map sharpening <i>B</i> factor (Å <sup>2</sup> )    | -125                                                             | -131                                                             |
| Model map FSC (masked)                              | 0.80                                                             | 0.85                                                             |
| Model composition                                   |                                                                  |                                                                  |
| Non-hydrogen atoms                                  | 8025                                                             | 8025                                                             |
| Protein residues                                    | 1019                                                             | 1019                                                             |
| Ligands                                             | 1                                                                | 1                                                                |
| <i>B</i> factors (Å <sup>2</sup> )                  |                                                                  |                                                                  |
| Protein                                             | 34                                                               | 61                                                               |
| Ligand                                              | 23                                                               | 47                                                               |
| R.m.s. deviations                                   |                                                                  |                                                                  |
| Bond lengths (Å)                                    | 0.008                                                            | 0.008                                                            |
| Bond angles (°)                                     | 1.38                                                             | 1.38                                                             |
| Validation                                          |                                                                  |                                                                  |
| MolProbity score                                    | 1.84                                                             | 1.55                                                             |
| Clashscore                                          | 6.4                                                              | 3.2                                                              |
| Poor rotamers (%)                                   | 0.89                                                             | 0.7                                                              |
| Ramachandran plot                                   |                                                                  |                                                                  |
| Favored (%)                                         | 92.1                                                             | 93.4                                                             |
| Allowed (%)                                         | 7.7                                                              | 6.4                                                              |
| Disallowed (%)                                      | 0.2                                                              | 0.2                                                              |

**Table S3. Cryo-EM data collection, refinement and validation statistics, related to Figure 4.**

|                                                     | Echovirus 6 bound to FcRn<br>pH 7.4<br>(EMDB-9687)<br>(PDB 6ILM) | Echovirus 6 bound to FcRn<br>pH 5.5<br>(EMDB-9686)<br>(PDB 6ILL) |
|-----------------------------------------------------|------------------------------------------------------------------|------------------------------------------------------------------|
| <b>Data collection and processing</b>               |                                                                  |                                                                  |
| Magnification                                       | 37037                                                            | 37037                                                            |
| Voltage (kV)                                        | 300                                                              | 300                                                              |
| Electron exposure (e <sup>-</sup> /Å <sup>2</sup> ) | 40                                                               | 40                                                               |
| Defocus range (µm)                                  | -1.0 to -3.0                                                     | -1.0 to -3.0                                                     |
| Pixel size (Å)                                      | 1.35                                                             | 1.35                                                             |
| Symmetry imposed                                    | Icosahedral                                                      | Icosahedral                                                      |
| Initial particle images (no.)                       | 233531                                                           | 42367                                                            |
| Final particle images (no.)                         | 26153                                                            | 937                                                              |
| Map resolution (Å)                                  | 3.4                                                              | 3.8                                                              |
| FSC threshold                                       | 0.143                                                            | 0.143                                                            |
| Map resolution range (Å)                            | 3.0-6.5                                                          | 3.0-8.0                                                          |
| <b>Refinement</b>                                   |                                                                  |                                                                  |
| Initial model used (PDB code)                       | Echovirus 6                                                      | Echovirus 6                                                      |
| Model resolution (Å)                                | 3.4                                                              | 3.8                                                              |
| Model resolution range (Å)                          | 540.0-3.4                                                        | 540.0-3.8                                                        |
| Map sharpening <i>B</i> factor (Å <sup>2</sup> )    | -151                                                             | -78                                                              |
| Model map FSC (masked)                              | 0.77                                                             | 0.81                                                             |
| Model composition                                   |                                                                  |                                                                  |
| Non-hydrogen atoms                                  | 9535                                                             | 6473                                                             |
| Protein residues                                    | 1202                                                             | 821                                                              |
| Ligands                                             | 1                                                                | 0                                                                |
| <i>B</i> factors (Å <sup>2</sup> )                  |                                                                  |                                                                  |
| Protein                                             | 54                                                               | 72                                                               |
| Ligand                                              | 41                                                               | -                                                                |
| R.m.s. deviations                                   |                                                                  |                                                                  |
| Bond lengths (Å)                                    | 0.004                                                            | 0.006                                                            |
| Bond angles (°)                                     | 1.11                                                             | 1.19                                                             |
| Validation                                          |                                                                  |                                                                  |
| MolProbity score                                    | 1.65                                                             | 1.98                                                             |
| Clashscore                                          | 4.6                                                              | 6.1                                                              |
| Poor rotamers (%)                                   | 0.29                                                             | 1.24                                                             |
| Ramachandran plot                                   |                                                                  |                                                                  |
| Favored (%)                                         | 93.9                                                             | 89.2                                                             |
| Allowed (%)                                         | 5.9                                                              | 10.7                                                             |
| Disallowed (%)                                      | 0.2                                                              | 0.1                                                              |
